# Supplementary material for: Rapid in-plate screening of biotransformation products in single zebrafish embryos
Source: Royal Society of Chemistry journal article supplement (doi:10.1039/d1ra01111a), 2021-01-01
Supplement: d1ra01111a1.pdf [file d1ra01111a1.pdf]

## Supplementary Information

### Rapid in-plate screening of biotransformation products in single zebrafish embryos

Anton Ribbenstedt\* and Jonathan P. Benskin

Department of Environmental Science and Analytical Chemistry (ACES), Stockholm University,  
Sweden

\*Corresponding author:

[Anton.Ribbenstedt@aces.su.se](mailto:Anton.Ribbenstedt@aces.su.se)

Abbreviations used in this document in order of appearance:

Desisopropylpropranolol = DIP-PPL

4/5-hydroxypropranolol = 4/5-OH PPL

4"-hydroxypropranolol sulfate = PPL-OH-SO<sub>4</sub>

3-(isopropylamino)-1,2-propanediol = IPA-PDOH

Dihydroxypropranolol = DihydroxyPPL

Propranolol glucuronide = PPL-Glucu

Hydroxypropranolol glucuronide = PPL-OH-Glucu

022\_40mg\_B1 (F841) #1000, RT=3.348 min, MS2, FTMS (+), (HCD, DDA, 218.1175@(10:25:45), +1)  
Propranolol + (Dealkylation) C13 H15 N O2, MW: 217.11028, Area: 413968674  
FISH Coverage: 8 Matched, 8 Unmatched, 0 Skipped

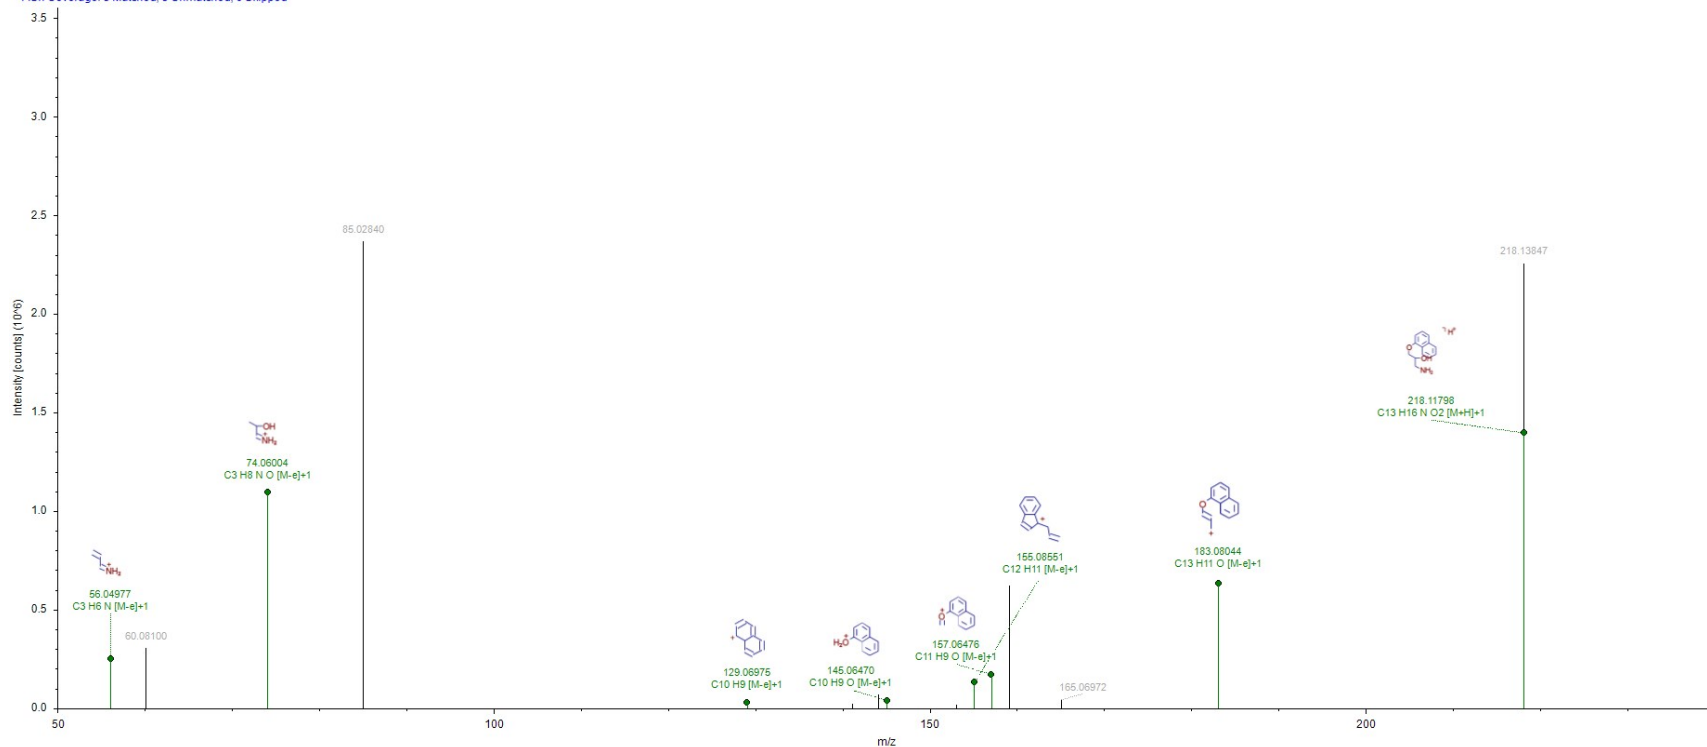

**Figure S1.** FISH scoring of feature 217.11040 (DIP-PPL), peak RT 3.431 from Compound Discoverer.

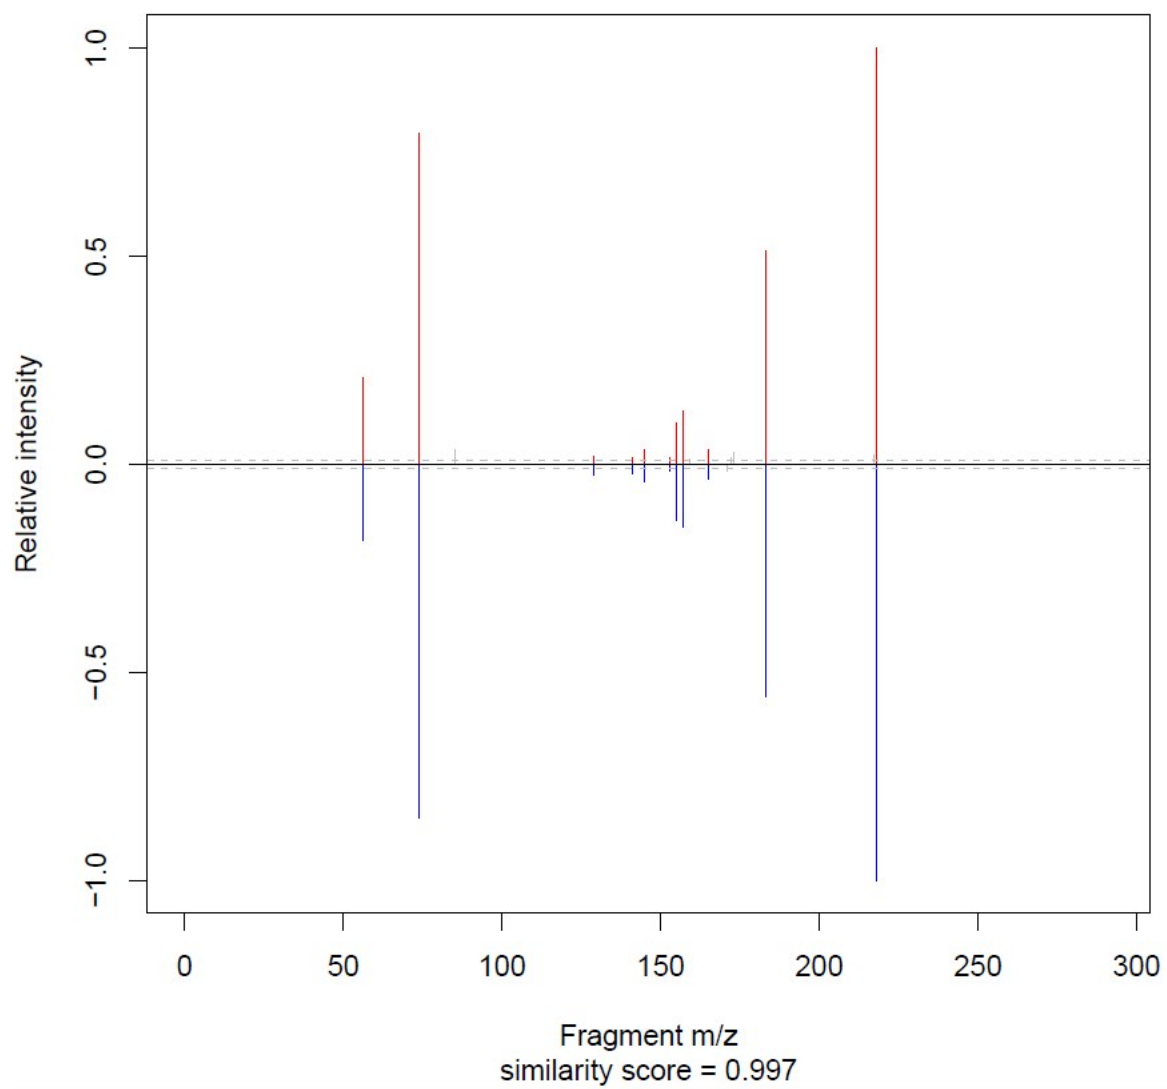

**Figure S2.** Similarity score from MSMSsim analysis of MS2 spectra of DIP-PPL from a sample (upper half) and an authentic standard (lower half).

076\_40mg\_B9 (F80) #1219, RT=3.112 min, MS2, FTMS (+), (HCD, DDA, 276.1592@(10;25;45), +1)  
 propranolol + (Oxidation) C16 H21 N O3, MW: 275.15214, Area: 26313102  
 FISH Coverage: 18 Matched, 0 Unmatched, 16 Skipped

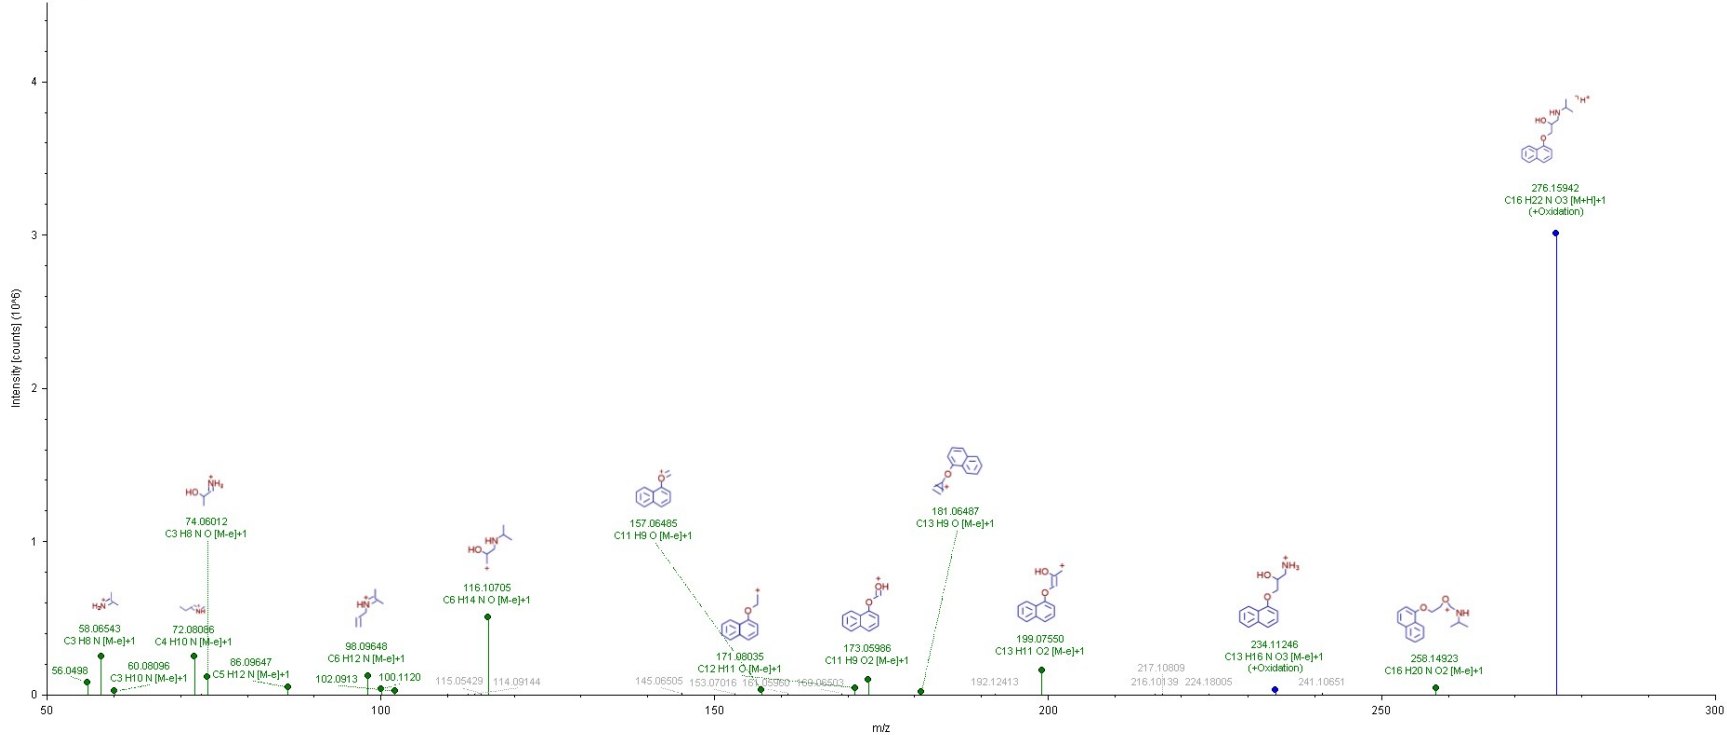

Figure S3. FISH scoring of feature 275.15231 (4-OH PPL), peak RT 3.194 from Compound Discoverer.

007\_40mg\_B6 (F826) #1273, RT=3.254 min, MS2, FTMS (+), (HCD, DDA, 276.1587@(10;25;45), +1)

FISH Coverage: 20 Matched, 13 Unmatched, 0 Skipped

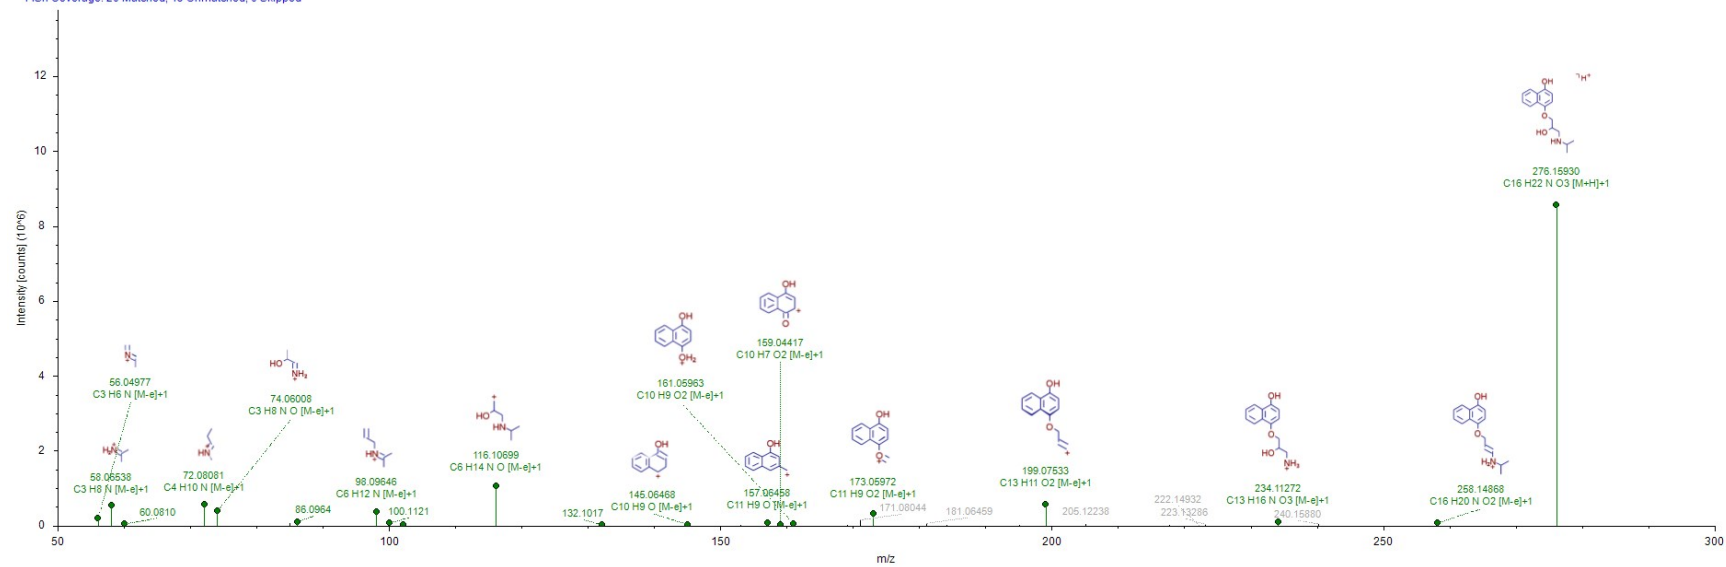

**Figure S4.** FISH scoring of feature 275.15231 (4-OH PPL), peak RT 3.269 from Compound Discoverer.

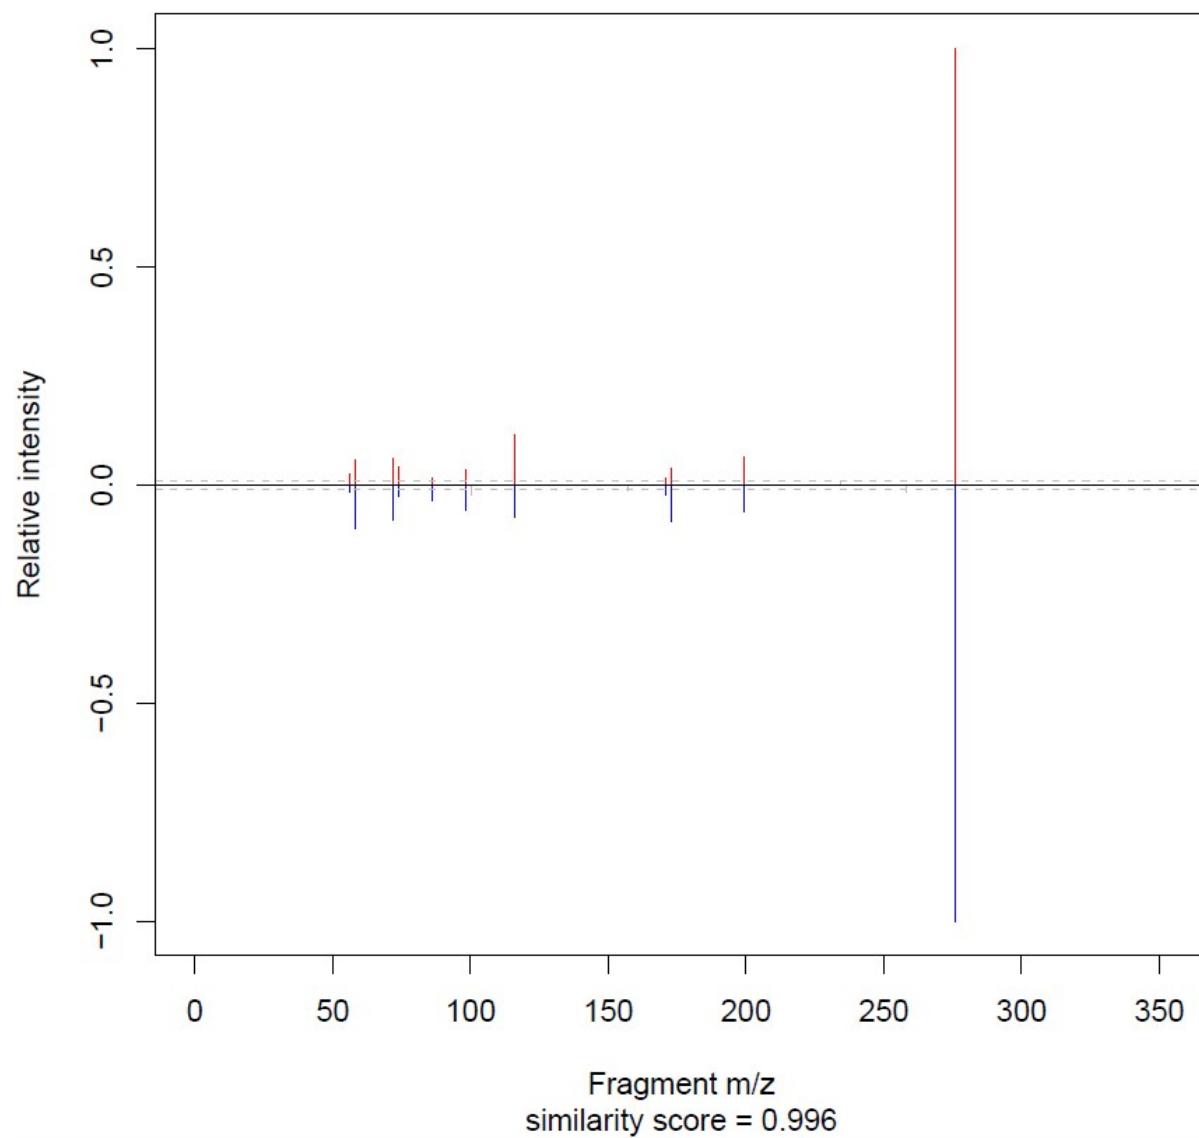

**Figure S5.** Similarity score from MSMSsim analysis of MS2 spectra of PPL-4OH at 3.194 from a sample (upper half) and an authentic standard (lower half).

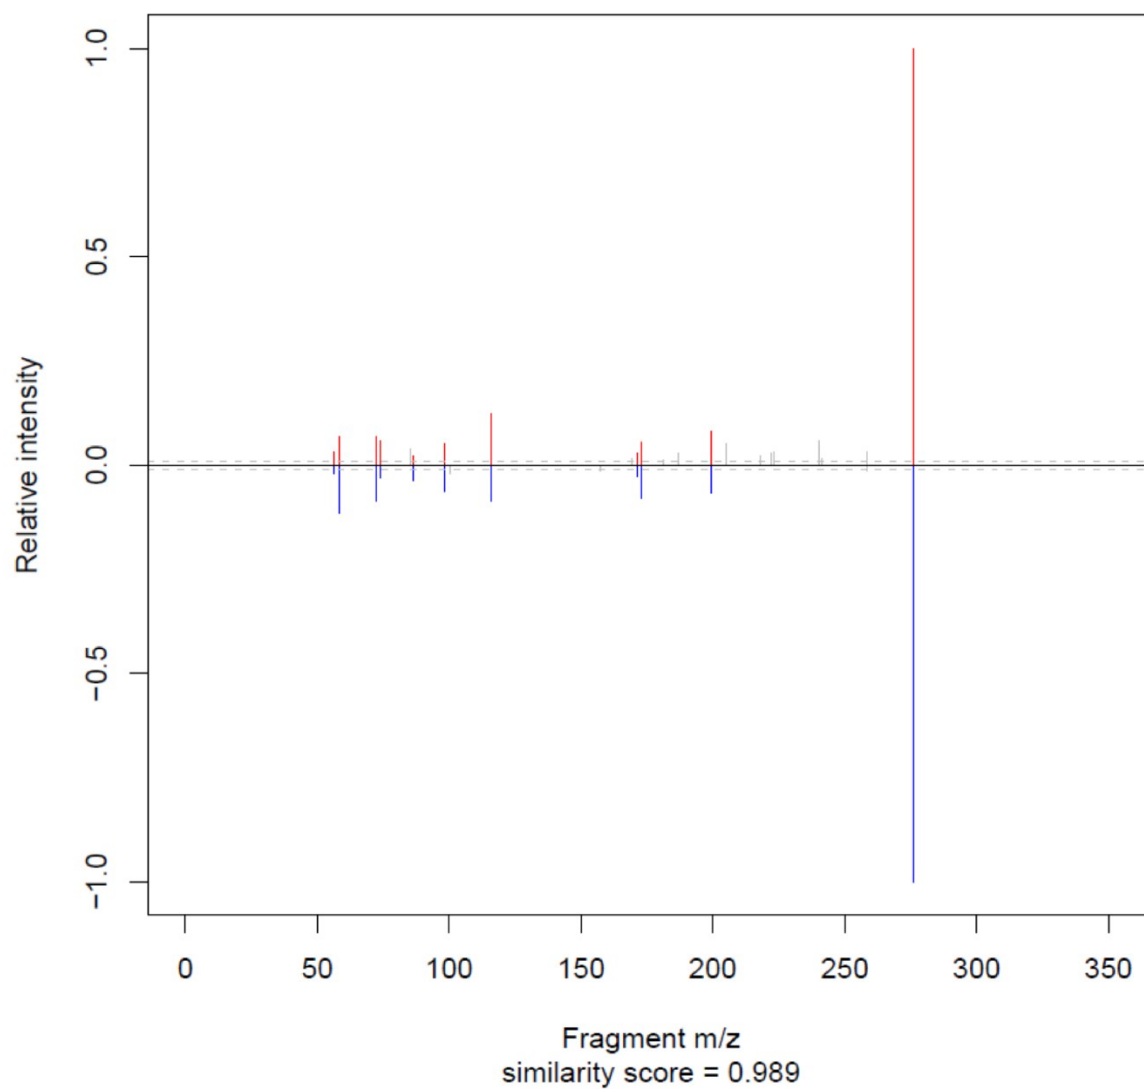

**Figure S6.** Similarity plot from MSMSsim analysis of MS2 spectra of 275.15218 Da at RT 3.269 min, believed to be PPL-5OH, from a sample (upper half) and an authentic standard of PPL-4OH (lower half). Portraying the high similarity as well as the subtle differences between the spectra.

022\_40mg\_B1 (F22) #1014, RT=3.436 min, MS2, FTMS (+), (HCD, DDA, 356.1158@(10;25;45), +1)  
 propranolol+ (Oxidation, Sulfation) C16 H21 N O6 S, MW: 355.10896, Area: 29815845  
 FISh Coverage: 24 Matched, 8 Unmatched, 17 Skipped

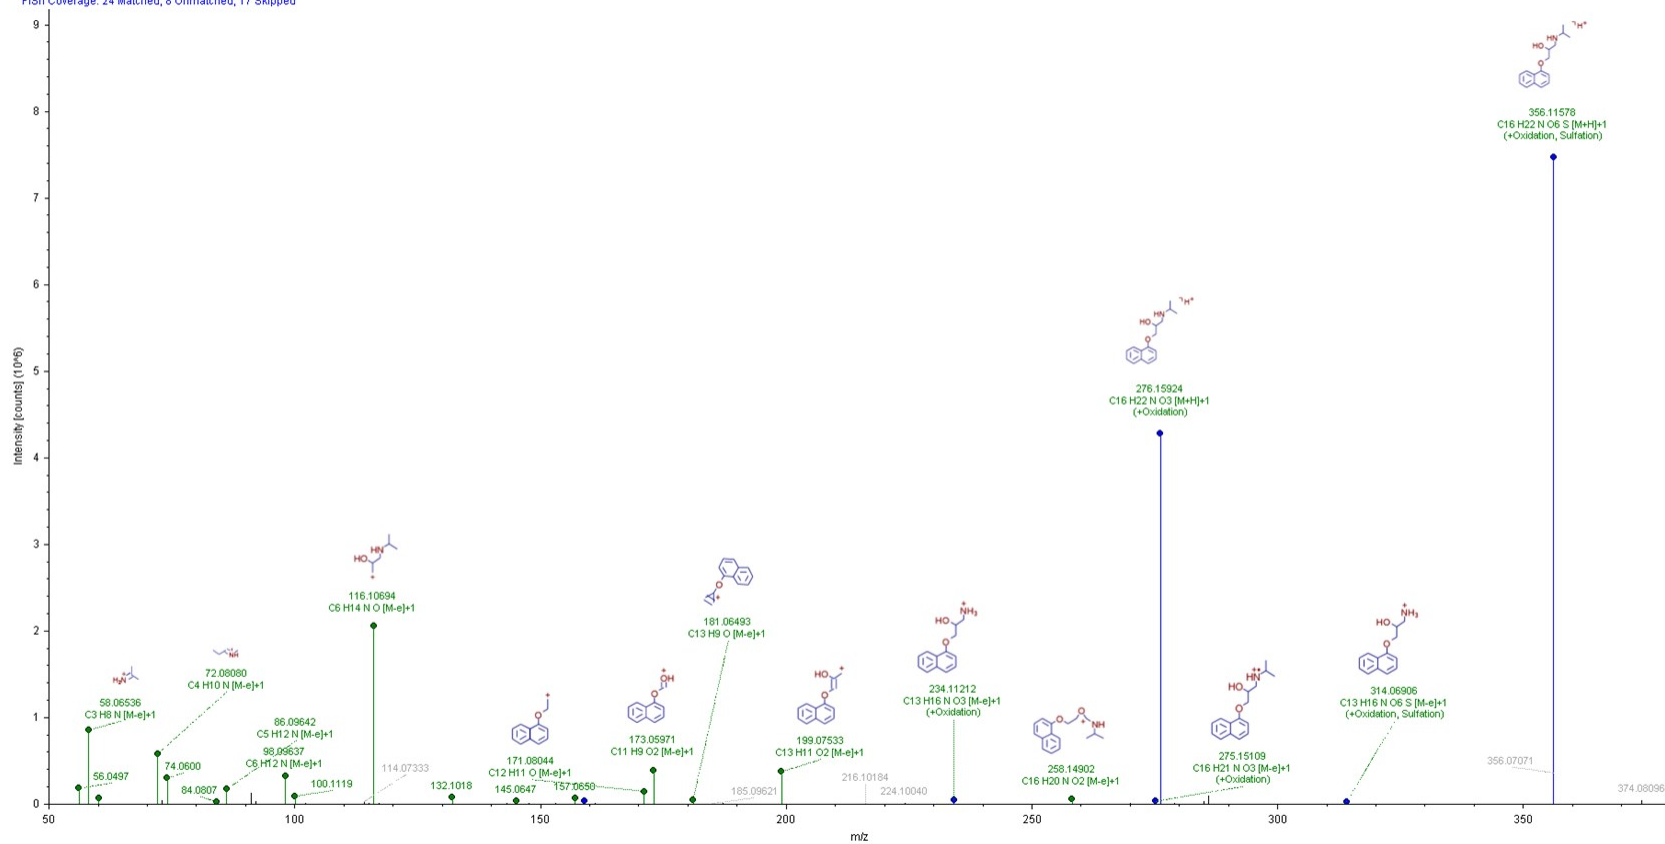

Figure S7. FISh scoring of feature 355.10880 (PPL-OH-SO<sub>4</sub> ; HILIC) from Compound Discoverer.



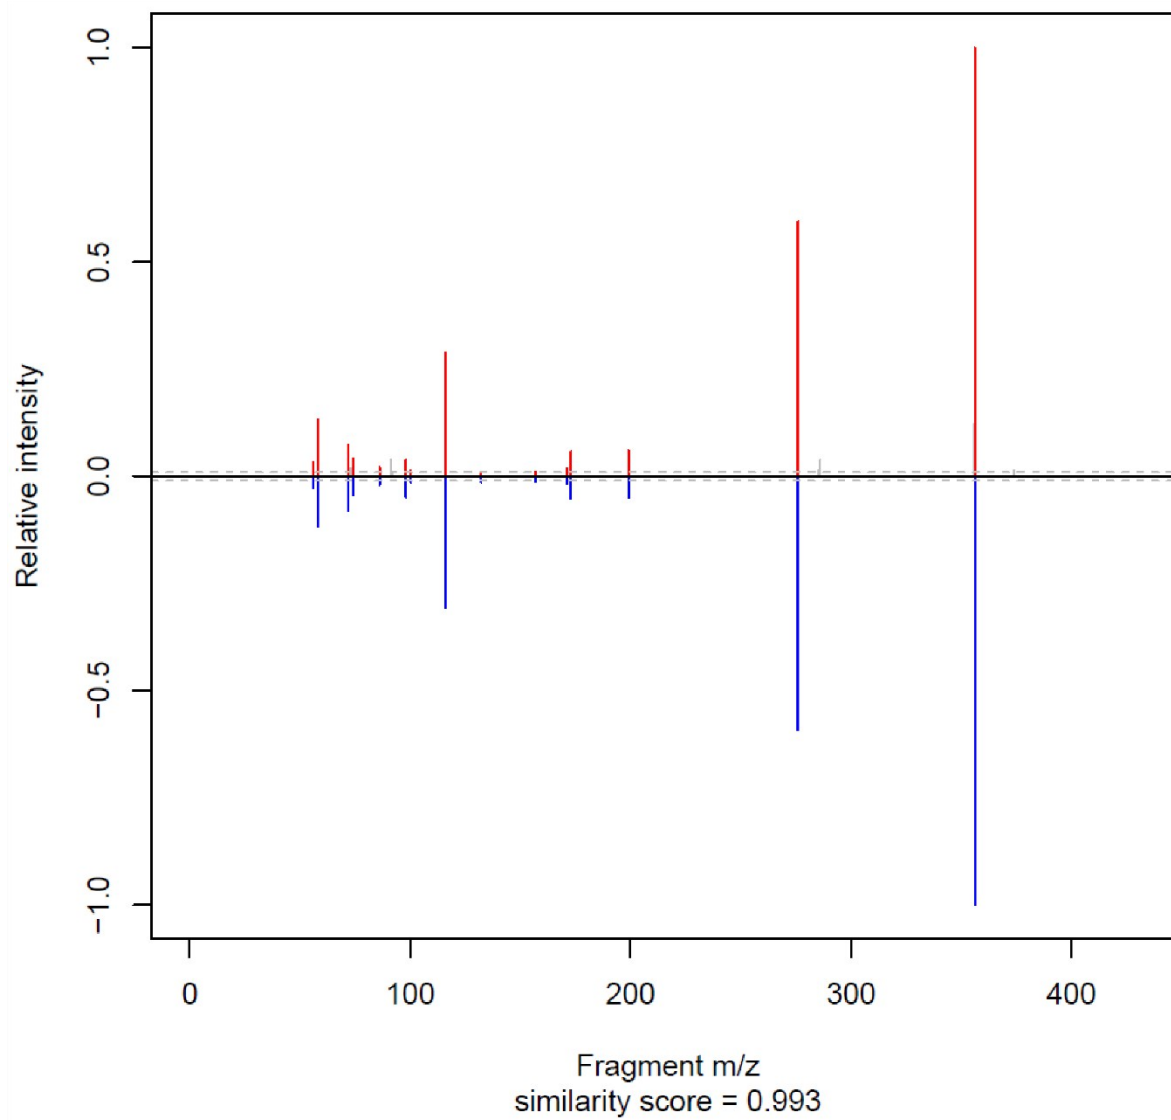

**Figure S8.** Similarity score from MSMSsim analysis of MS2 spectra of PPL-OH-SO4 (HILIC) from a sample (upper half) and an authentic standard (lower half).

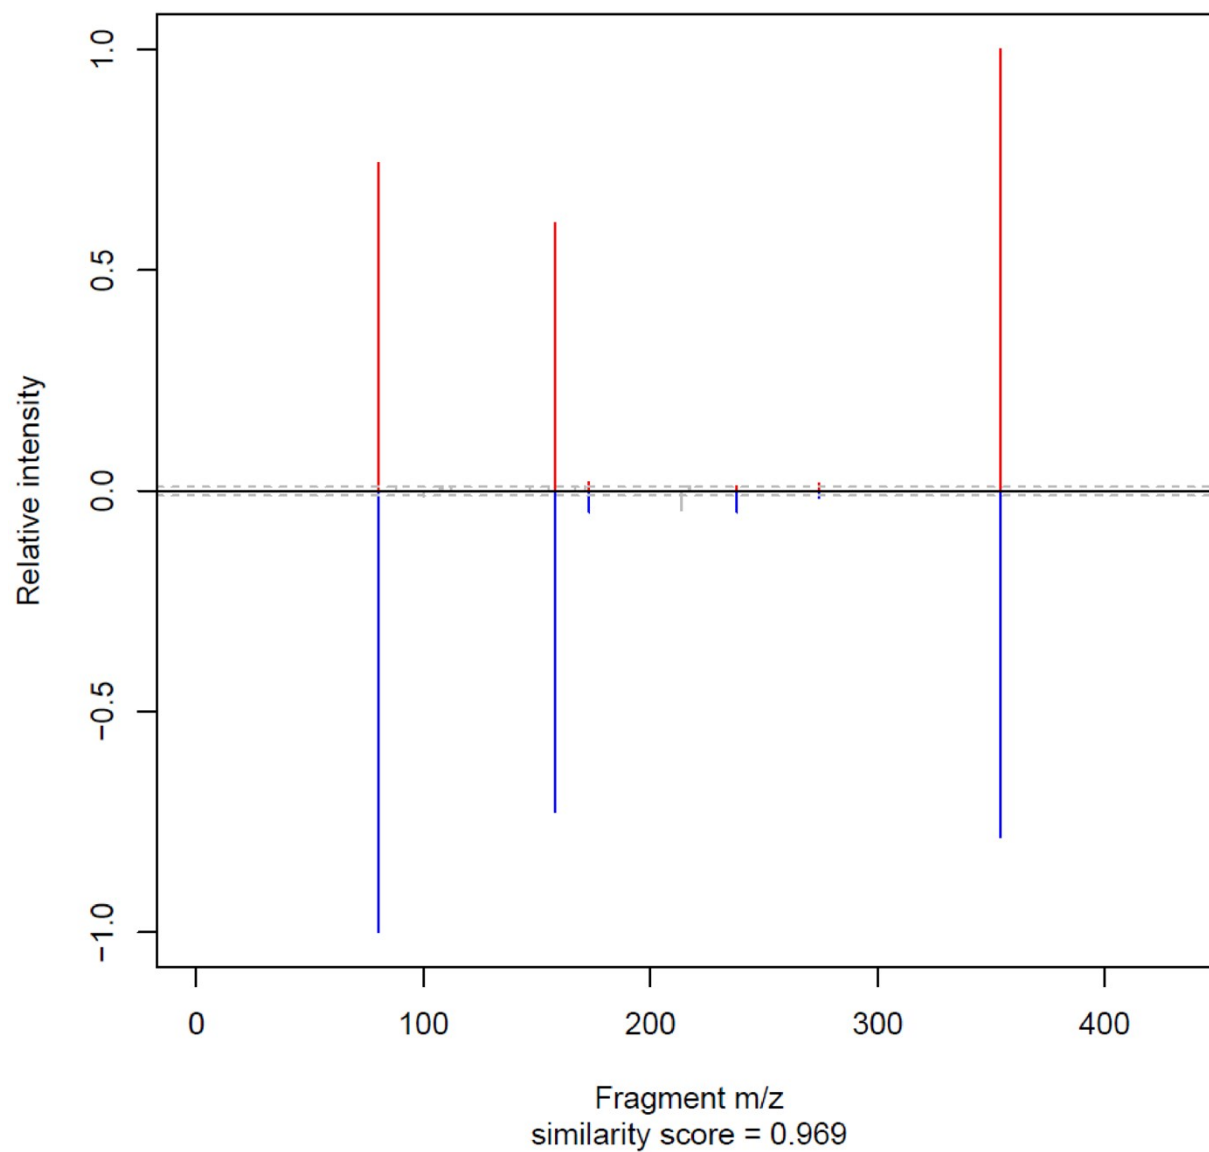

**Figure S9.** Similarity score from MSMSsim analysis of MS2 spectra of PPL-OH-SO4 (C18) from a sample (upper half) and an authentic standard (lower half).

122\_40mg\_B4 (F126) #1337, RT=3.573 min, MS2, FTMS (+), (HCD, DDA, 134.1177@(10;25;45), +1)  
propranolol + (Dealkylation, Reduction) C6 H15 N O2, MW: 133.11028, Area: 635585781  
FISH Coverage: 8 Matched, 2 Unmatched, 8 Skipped

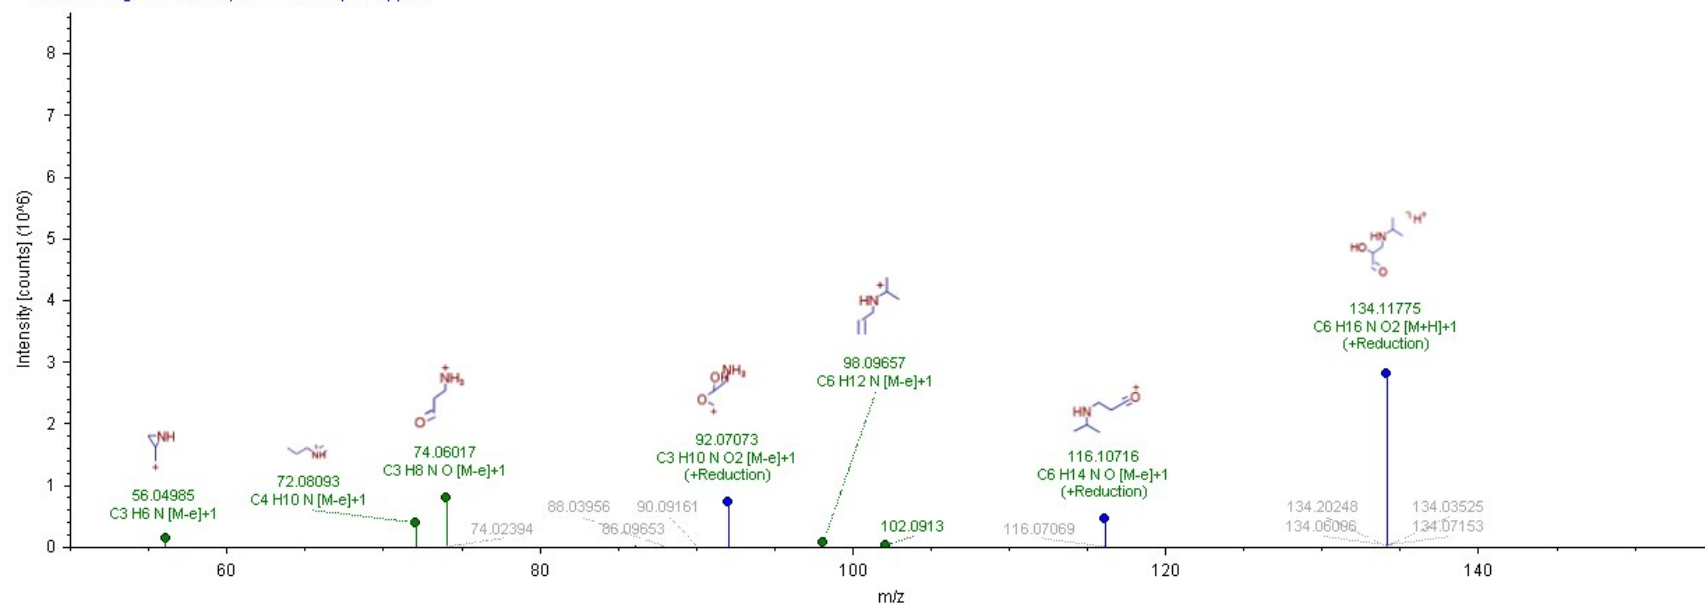

**Figure S10.** FISH scoring of feature 133.16258 (IPA-PDOH) at RT 3.828 min from Compound Discoverer.

079\_40mg\_B3 (F83) #1405, RT=3.573 min, MS2, FTMS (+), (HCD, DDA, 134.1175@(10:25:45), +1)  
propranolol + (Dealkylation, Reduction) C6 H15 N O2, MW: 133.11028, Area: 38030075  
FISH Coverage: 8 Matched, 2 Unmatched, 6 Skipped

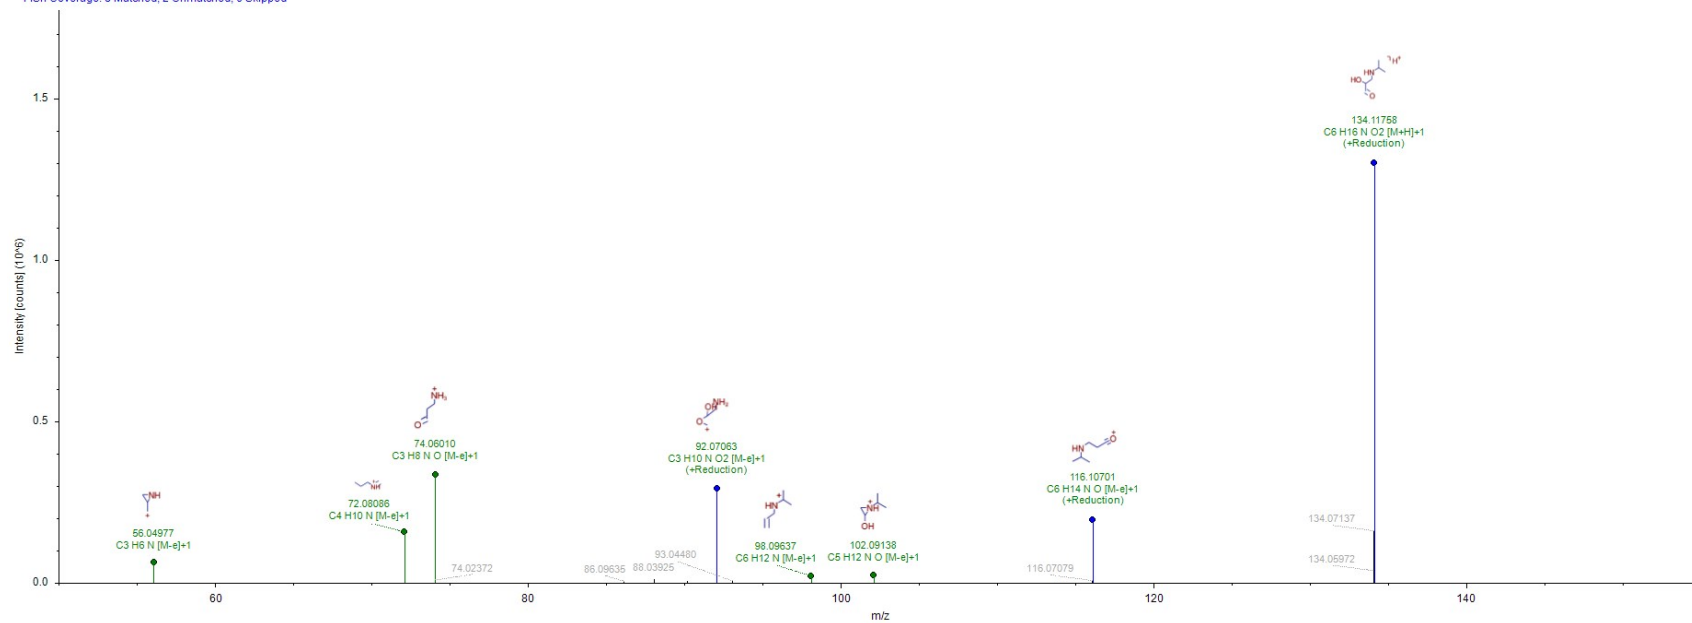

**Figure S11.** FISH scoring of feature 133.16258 (IPA-PDOH) at RT 3.668 min from Compound Discoverer.

020\_40mg\_B2 (F839) #1125, RT=3.610 min, MS2, FTMS (+), (HCD, DDA, 294.1699@(10;25;45), +1)  
Propranolol + (Hydration, Oxidation) C16 H23 N O4, MW: 293.16271, Area: 10599388  
FISH Coverage: 12 Matched, 0 Unmatched, 0 Skipped

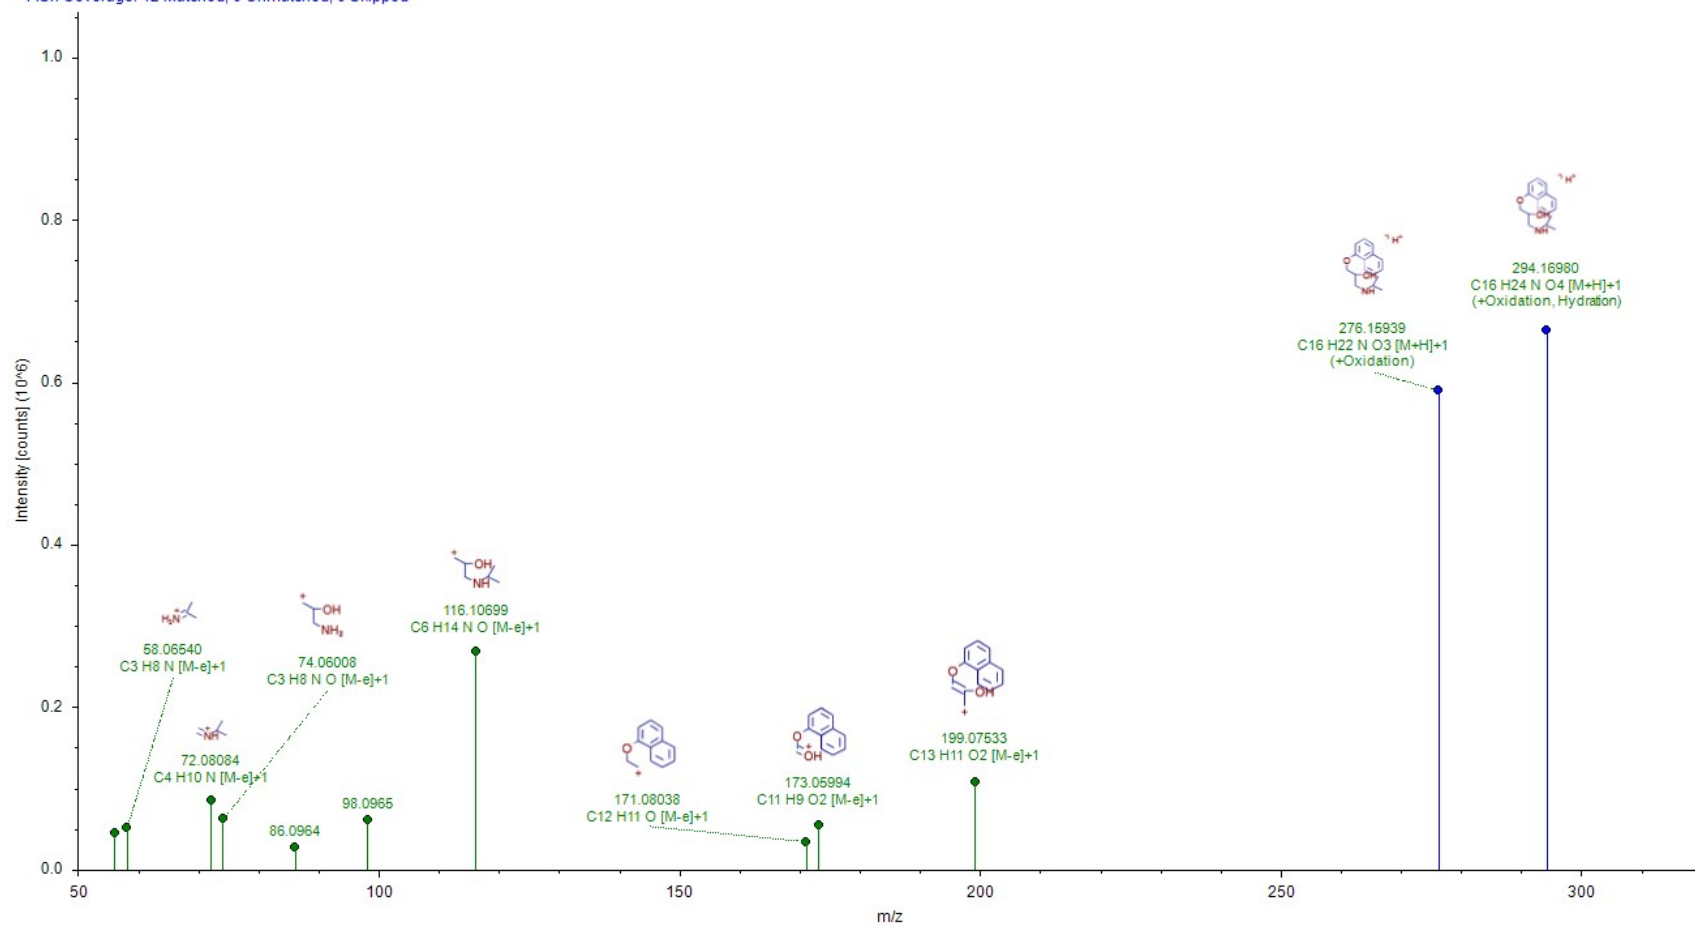

Figure S12. FISH scoring of feature 293.16258 (DihydroxyPPL; HILIC) from Compound Discoverer.

022\_40mg\_B1 (F841)#1139, RT=3.689 min, MS2, FTMS (+), (HCD, DDA, 436.1961@10.2545), +1  
Propranolol - (Glucuronide Conjugation) C22 H29 N O8, MW: 435.18932, Area: 102654794  
FISH Coverage: 24 Matched, 18 Unmatched, 0 Skipped

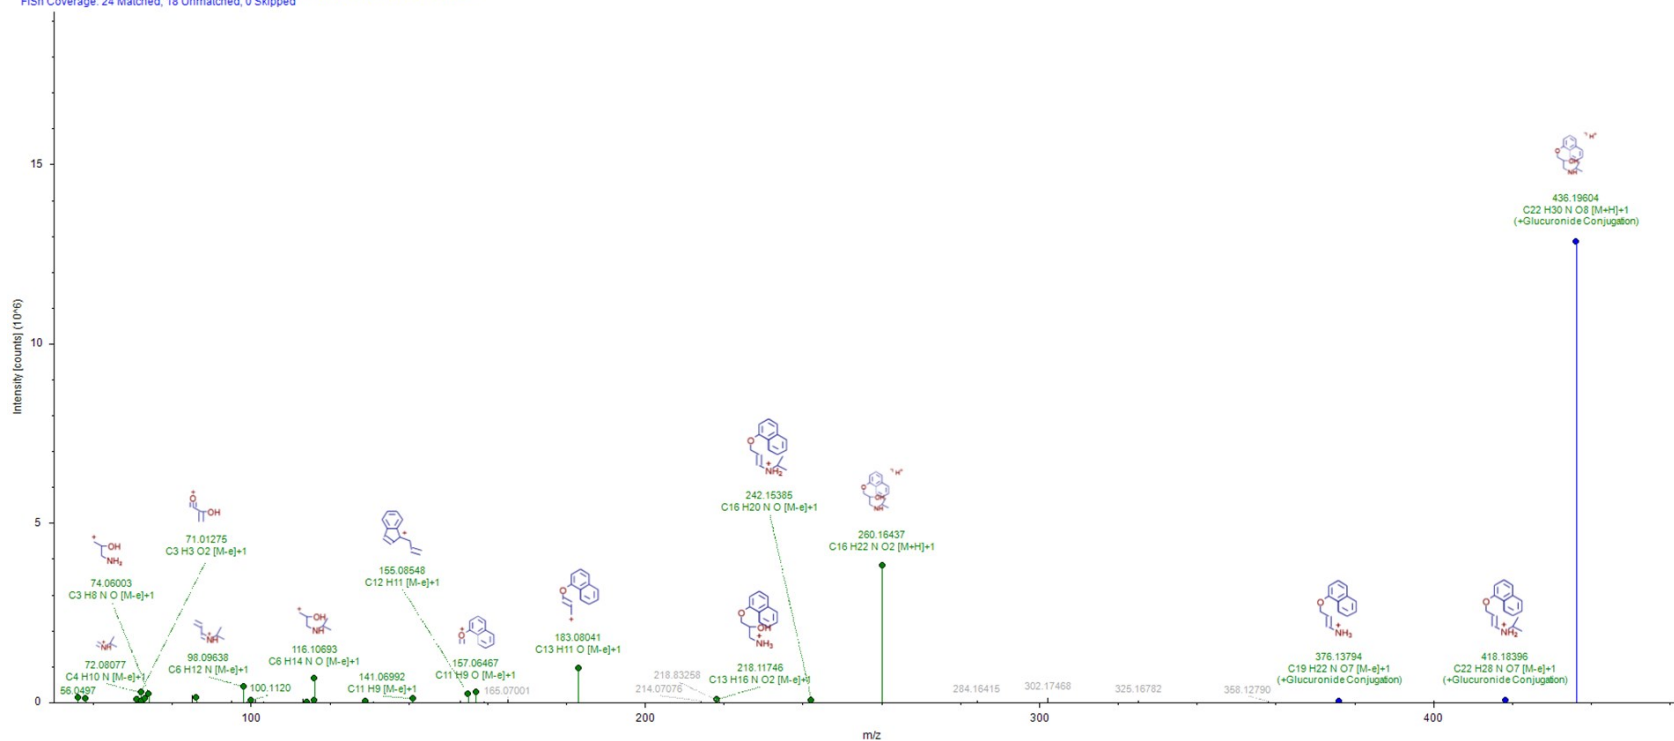

**Figure S13.** FISH scoring of feature 435.18914 (PPL-Glucu; HILIC) from Compound Discoverer.

022\_40mg\_B1 (F160) #1343, RT=5.368 min, MS2, FTMS (-), (HCD, DDA, 434.1820@(10:35:60), -1)  
Propranolol + (Dealkylation, Acetylation, Glucoside Conjugation, Methylation) C22 H29 N O8, MW: 435.18932, Area: 12123467  
FISH Coverage: 3 Matched, 8 Unmatched, 0 Skipped

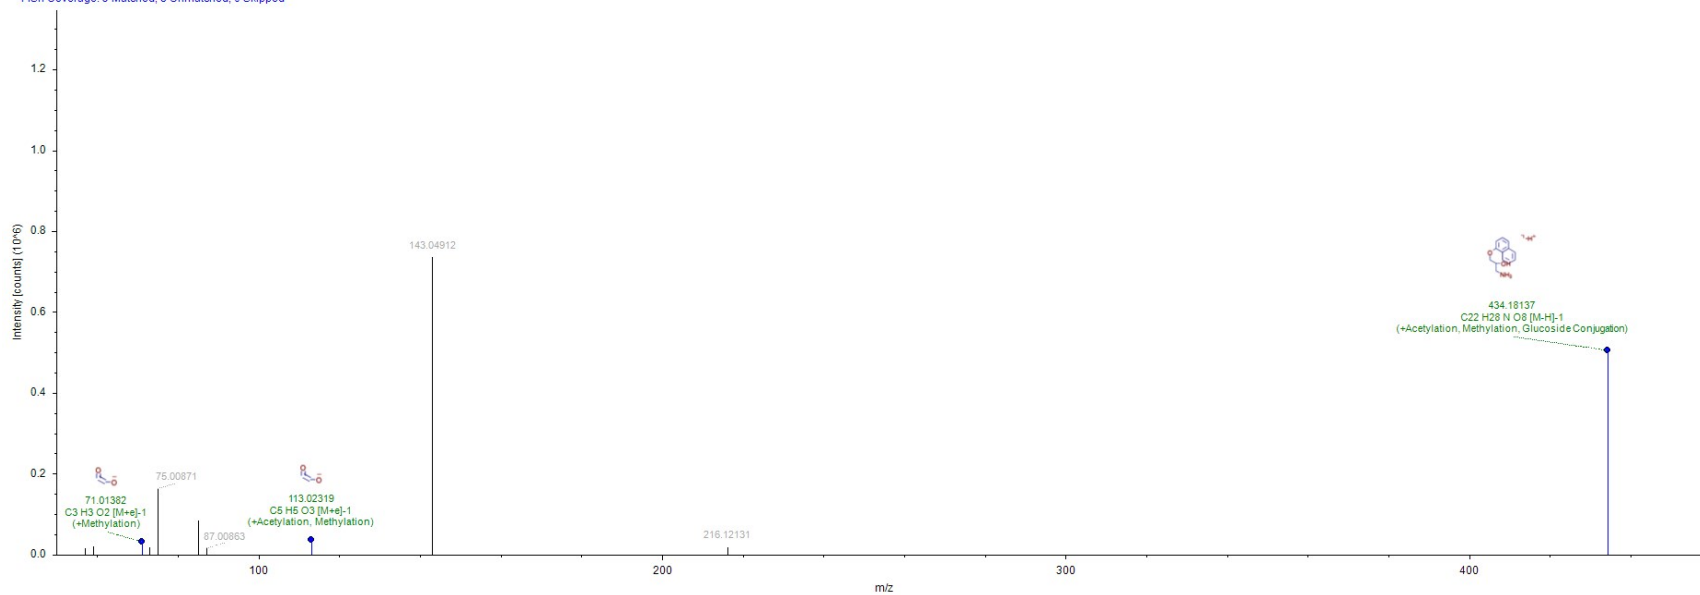

**Figure S14.** FISH scoring of feature 435.18914 (PPL-Glucu; C18) from Compound Discoverer.

022\_40mg\_B1 (F841) #1260, RT=3.974 min, MS2, FTMS (+), (HCD, DDA, 452.1913@(10:25:45), +1)  
 Propranolol + (Oxidation, Glucuronide Conjugation) C22 H29 N O9, MW: 451.18423, Area: 821717336  
 FISH Coverage: 15 Matched, 1 Unmatched, 0 Skipped

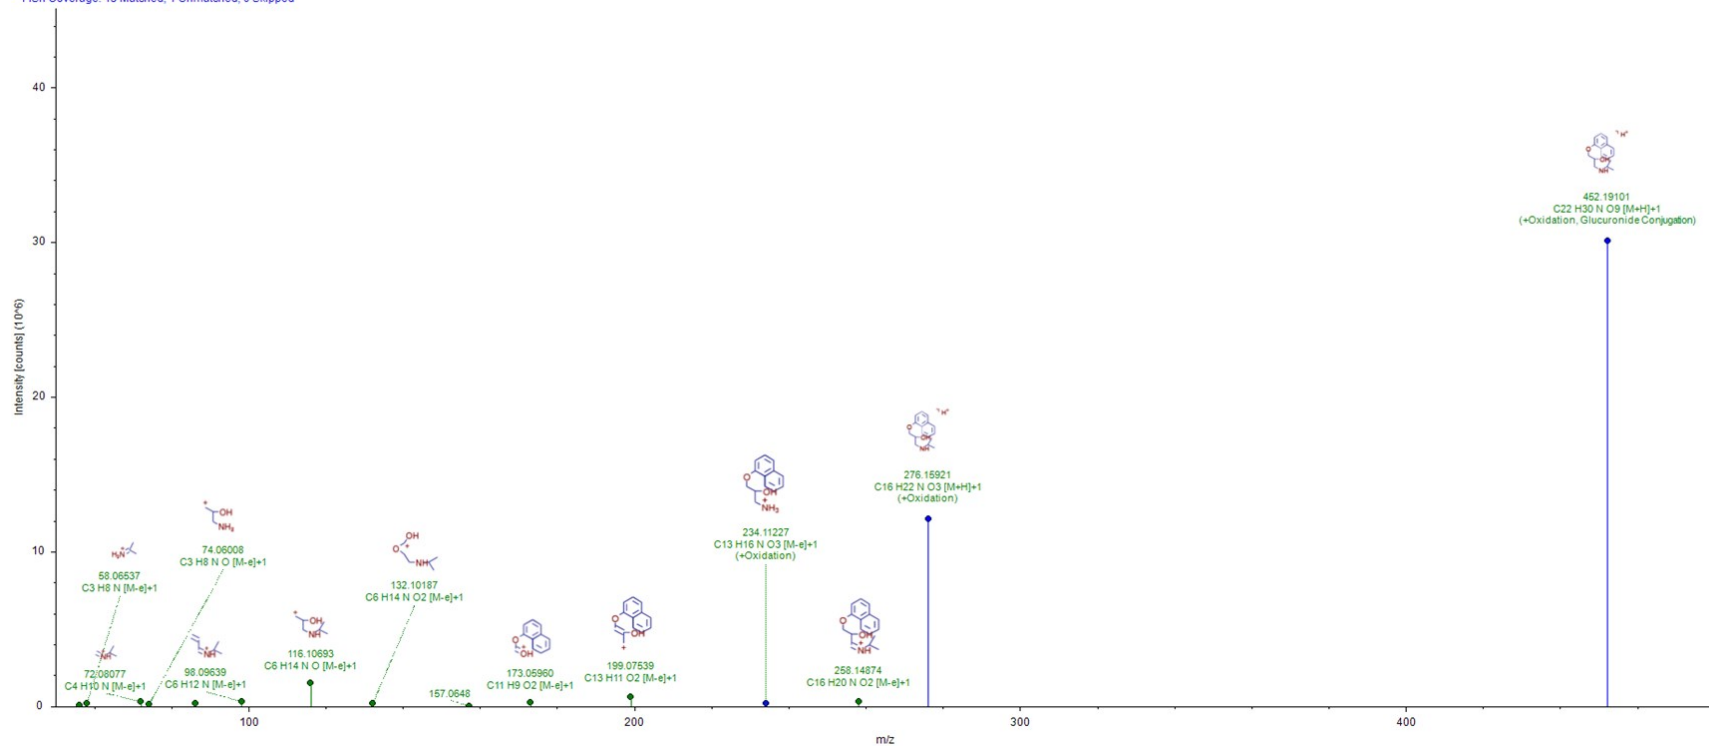

**Figure S15.** FISH scoring of feature 451.18423 (PPL-OH-Glucu; HILIC) from Compound Discoverer.



022\_40mg\_B1 (F982) #251, RT=1.127 min, MS2\_FTMS (-), (HCD, DDA, 450.1767@(10.35.60), -1)  
Propranolol - (Dealkylation, Reduction, Glucoside Conjugation, Glycine Conjugation, Methylation) C22 H29 N O9, MW: 451.18423, Area: 29380689  
FISH Coverage: 9 Matched, 19 Unmatched, 0 Skipped

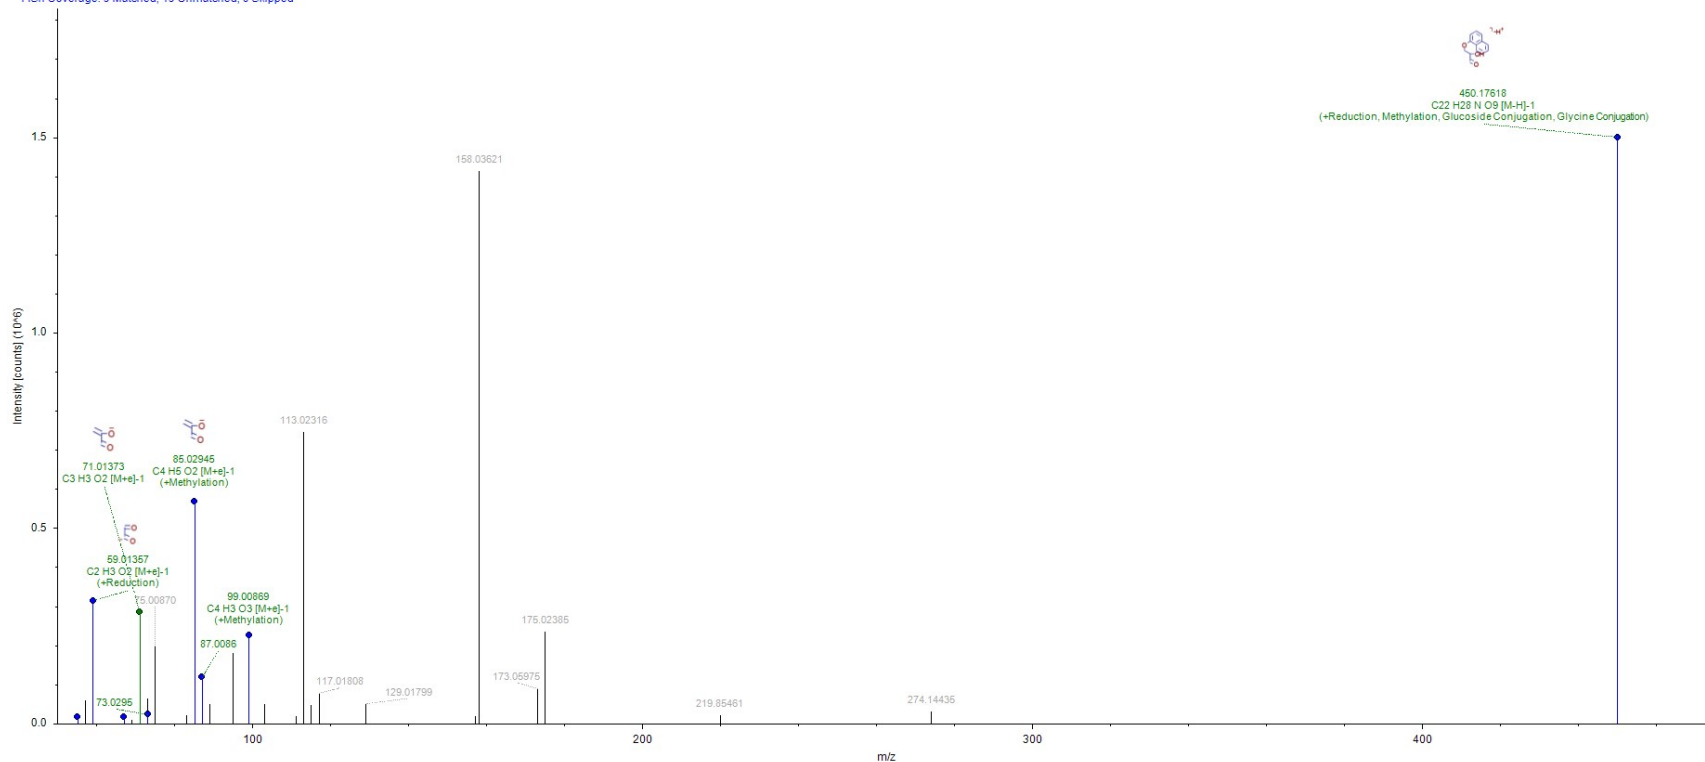

**Figure S16.** FISH scoring of feature 451.18407 (PPL-OH-Glucu; C18), peak RT 1.100 from Compound Discoverer.

022\_40mg\_B1 (F160) #801, RT=3.526 min, MS2, FTMS (-), (HCD, DDA, 450.1768@(10:35:60), -1)  
Propranolol - (Dealkylation, Reduction, Glucoside Conjugation, Glycine Conjugation, Methylation) C22 H29 N O9, MW: 451.18423, Area: 33478402  
FISH Coverage: 6 Matched, 7 Unmatched, 0 Skipped

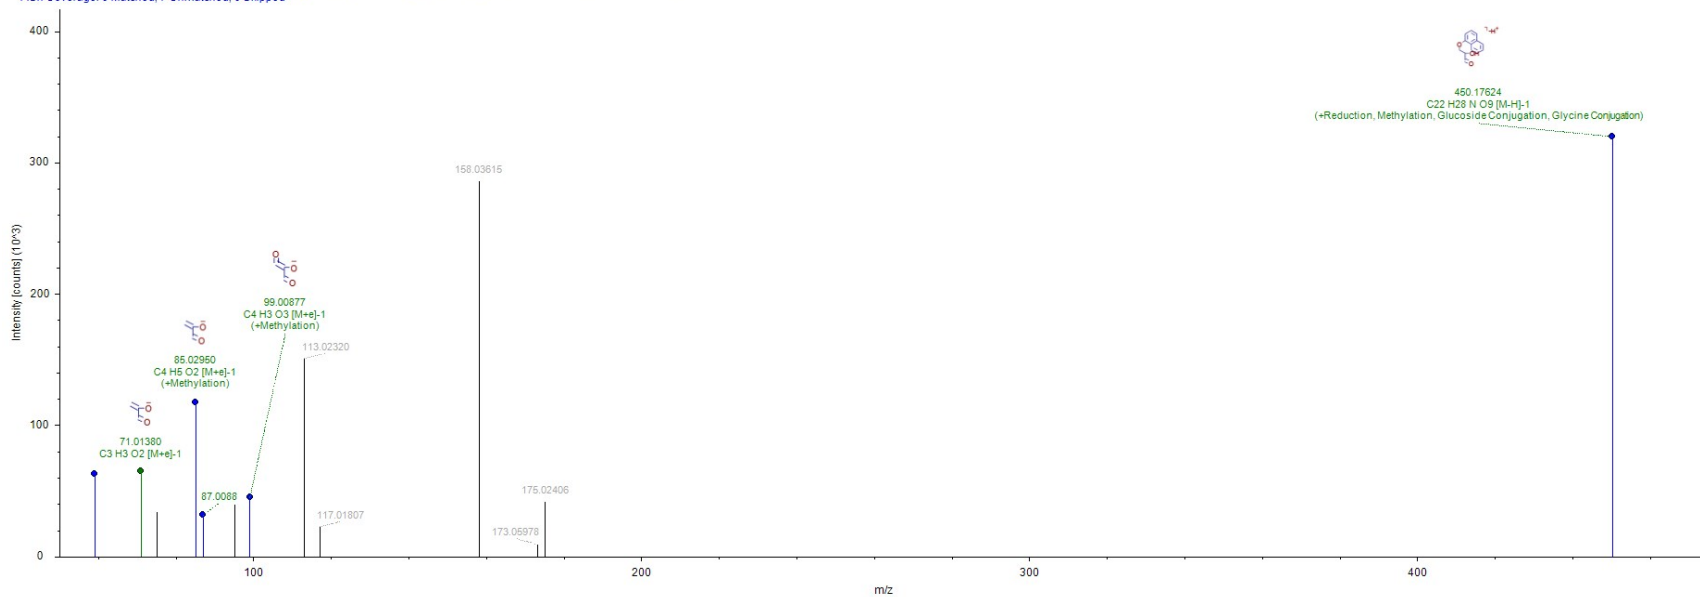

**Figure S17.** FISH scoring of feature 451.18407 (PPL-OH-Glucu; C18), peak RT 3.591 from Compound Discoverer.

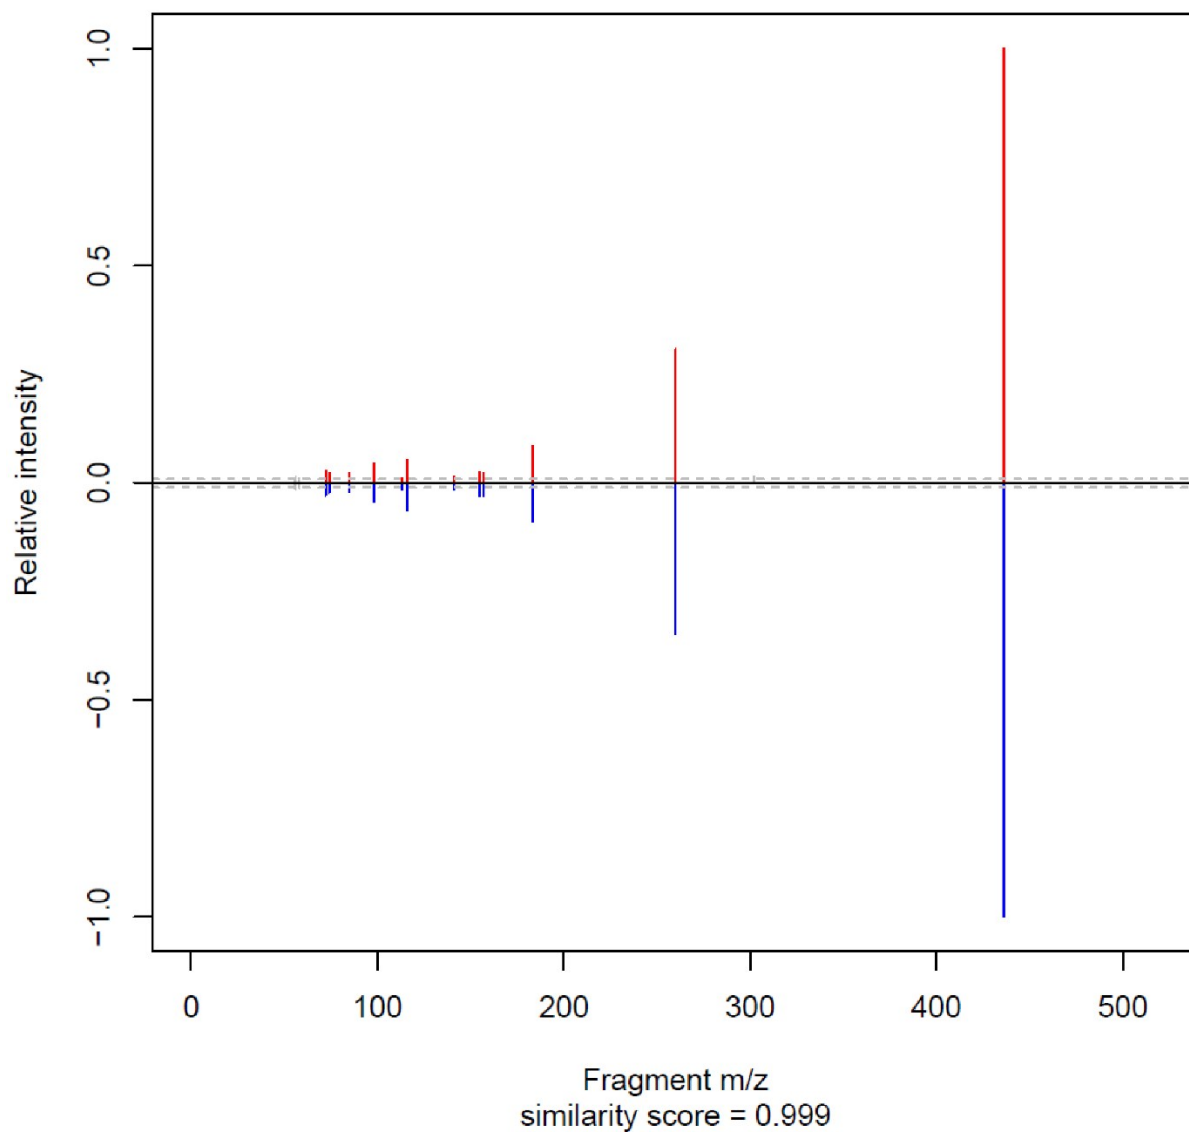

**Figure S18.** Similarity score from MSMSsim analysis of MS2 spectra of PPL-Glucu (HILIC) from a sample (upper half) and an authentic standard (lower half).

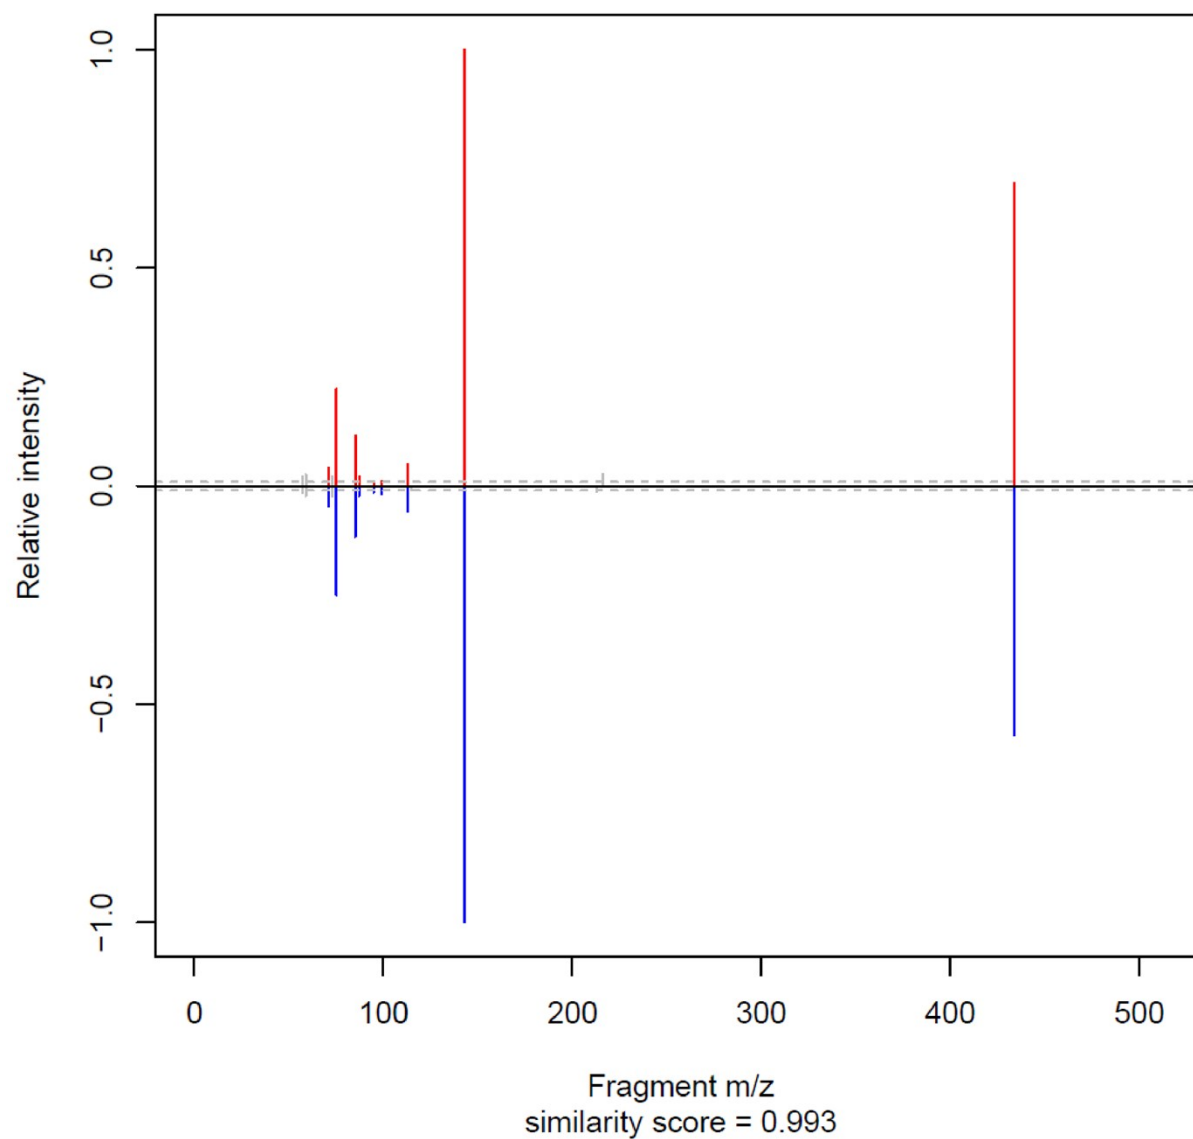

**Figure S19.** Similarity score from MSMSsim analysis of MS2 spectra of PPL-Glucu (C18) from a sample (upper half) and an authentic standard (lower half).

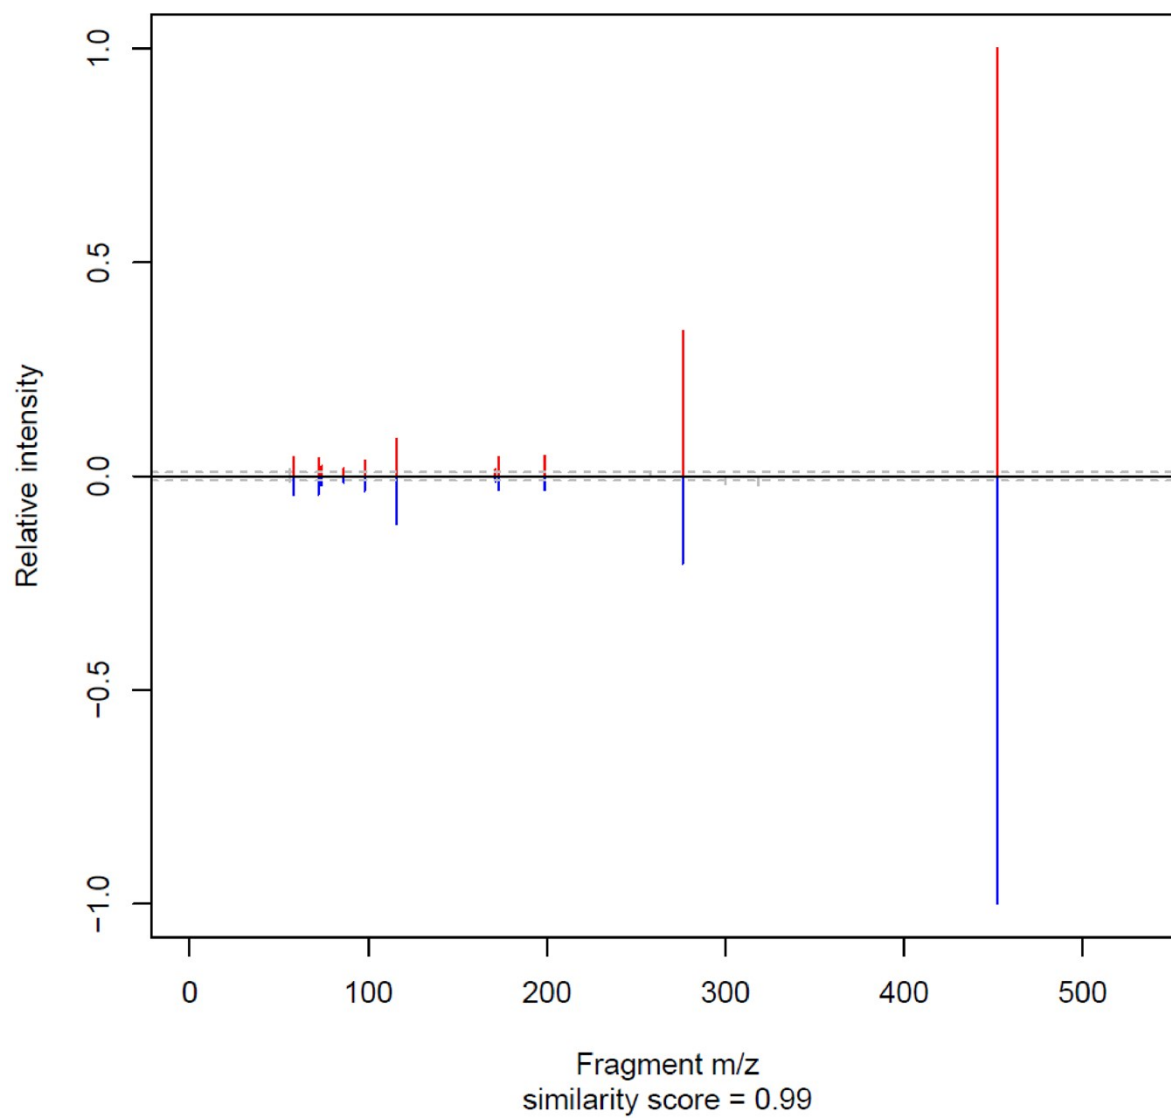

**Figure S20.** Similarity score from MSMSsim analysis of MS2 spectra of PPL-OH-Glucu (HILIC) from a sample (upper half) and an authentic standard (lower half).

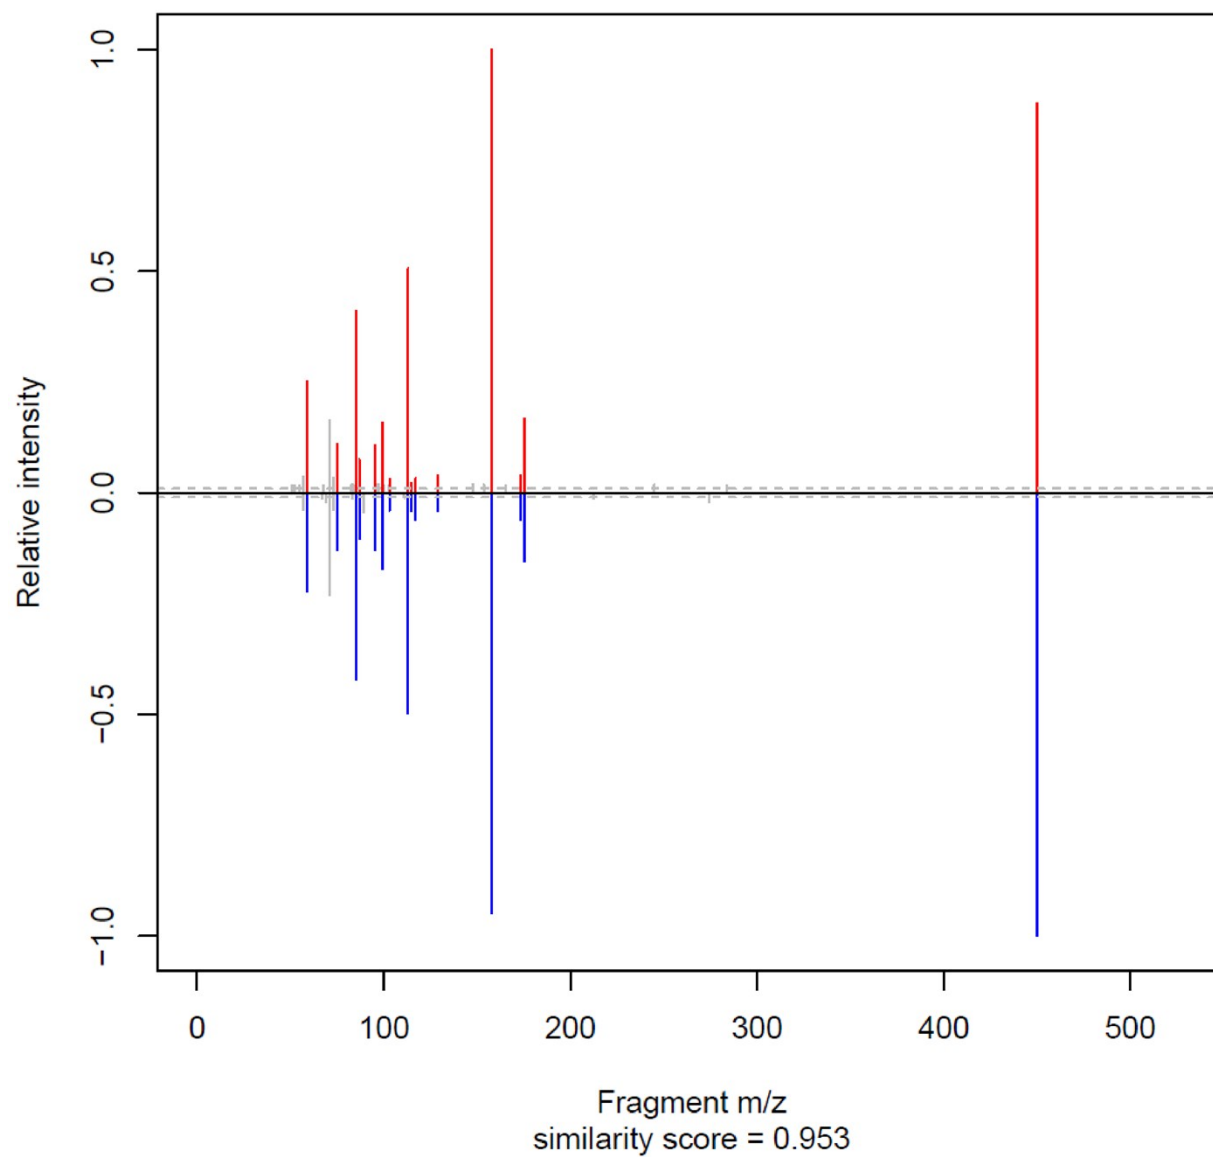

**Figure S21.** Similarity score from MSMSsim analysis of MS2 spectra of PPL-OH-Glucu (HILIC) from a sample (upper half) and an authentic standard (lower half).

**Table S1.** Sirius+CSI:FingerID (v4.5.1) settings for identification of features. All settings not mentioned were left at default.

| <b>Parameter</b>              | <b>Setting</b>                                                |
|-------------------------------|---------------------------------------------------------------|
| <b>SIRIUS</b>                 |                                                               |
| Instrument                    | Orbitrap                                                      |
| MS/MS isotope scorer          | IGNORE                                                        |
| MS2 MassDev (ppm)             | 5                                                             |
| Candidates                    | 10                                                            |
| Candidates per ion            | 1                                                             |
| Consider only formulas in DBs | All included DBs                                              |
| Possible ionizations          | [M+H] <sup>+</sup> , [M+K] <sup>+</sup> , [M+Na] <sup>+</sup> |
| <b>ZODIAC</b>                 |                                                               |
| All settings                  | Default                                                       |
| <b>CSI:FingerID</b>           |                                                               |
| Search in DBs                 | All included DBs                                              |
| Fallback adducts              | [M+H] <sup>+</sup> , [M+K] <sup>+</sup> , [M+Na] <sup>+</sup> |

**Table S2.** MSMSsim script settings for MS2 comparisons between authentic standards and samples which varied between features. All settings not mentioned in the table were the same for all features and were: ppm tolerance = 5, relative intensity cutoff = 0.01. All settings not mentioned were left at default.

| <b>Peak annotation</b> | <b>Ion mode</b> | <b>RT (min)</b> | <b>m/z tolerance</b> | <b>RT window (sec)</b> |
|------------------------|-----------------|-----------------|----------------------|------------------------|
| DIP-PPL                | Pos(HILIC)      | 3.2             | 0.0015               | 20                     |
| PPL-4OH                | Pos(HILIC)      | 3.07            | 0.001                | 10                     |
| PPL-5OH                | Pos(HILIC)      | 3.18            | 0.0012               | 10                     |
| PPL-OH-SO4             | Pos(HILIC)      | 3.2             | 0.00098              | 20                     |
| PPL-OH-SO4             | Neg(C18)        | 4.1             | 0.0025               | 30                     |
| PPL-Glucu              | Pos(HILIC)      | 3.5             | 0.00175              | 30                     |
| PPL-Glucu              | Neg(C18)        | 3.6             | 0.0015               | 30                     |
| PPL-OH-Glucu           | Pos(HILIC)      | 3.7             | 0.0015               | 30                     |
| PPL-OH-Glucu           | Neg(C18)        | 5.4             | 0.0015               | 30                     |



## Text S1. Biotransformation product analysis workflow settings from Compound Discoverer

Search name: HILICPPLMetabNewSettings

Search description: Untargeted Metabolomics workflow: Retention time alignment, Component Detection, Grouping, Elemental Composition Prediction, Gap Filling, Hide chemical Background (using blanks), ID using mzCloud (needs MS/MS) and ChemSpider (using Formula); KEGG Pathway Mapping and Differential Analysis (ANOVA, adjusted p-values, fold change, CV, etc.)

Search date: 3/9/2020 4:29:52 PM

Created with Discoverer version: 3.1.0.305

[Input Files (0)]

-->Select Spectra (36)

[Select Spectra (36)]

-->Align Retention Times (2)

[Align Retention Times (2)]

-->Detect Compounds (3)

-->Find Expected Compounds (27)

[Generate Expected Compounds (32)]

-->Find Expected Compounds (27)

[Detect Compounds (3)]

-->Group Compounds (23)

[Find Expected Compounds (27)]

-->Group Expected Compounds (33)

[Group Compounds (23)]

-->Fill Gaps (21)

-->Search mzCloud (37)

-->Assign Compound Annotations (40)

-->Search Mass Lists (38)

-->Search mzVault (39)

-->Mark Background Compounds (24)

-->Search ChemSpider (10)

-->Predict Compositions (8)

[Group Expected Compounds (33)]

-->FISH Scoring (34)

-->Mark Background Compounds (35)

-->Search mzCloud (37)

-->Search Mass Lists (38)

-->Search mzVault (39)

[Fill Gaps (21)]  
[Search mzCloud (37)]  
[Assign Compound Annotations (40)]  
[Search Mass Lists (38)]  
[Search mzVault (39)]  
[Mark Background Compounds (24)]  
[Search ChemSpider (10)]  
[Predict Compositions (8)]  
[FISH Scoring (34)]  
[Mark Background Compounds (35)]  
[Differential Analysis (12)]

---

Processing node 0: Input Files

---

Input Data:

- File Name(s) (Hidden):

D:\Anton\ZFE\180531 - HILIC\PlateB\001\_QC\_BA2.raw  
D:\Anton\ZFE\180531 - HILIC\PlateB\002\_QC\_BA2.raw  
D:\Anton\ZFE\180531 - HILIC\PlateB\003\_QC\_BA2.raw  
D:\Anton\ZFE\180531 - HILIC\PlateB\004\_40ug\_D4.raw  
Etc. Etc.

---

Processing node 36: Select Spectra

---

1. General Settings:

- Precursor Selection: Use MS(n - 1) Precursor
- Use Isotope Pattern in Precursor Reevaluation: True
- Provide Profile Spectra: Automatic
- Store Chromatograms: False

2. Spectrum Properties Filter:

- Lower RT Limit: 0
- Upper RT Limit: 0
- First Scan: 0

- Last Scan: 0
- Ignore Specified Scans: (not specified)
- Lowest Charge State: 0
- Highest Charge State: 0
- Min. Precursor Mass: 0 Da
- Max. Precursor Mass: 5000 Da
- Total Intensity Threshold: 0
- Minimum Peak Count: 1

### 3. Scan Event Filters:

- Mass Analyzer: (not specified)
- MS Order: Any
- Activation Type: (not specified)
- Min. Collision Energy: 0
- Max. Collision Energy: 1000
- Scan Type: Any
- Polarity Mode: (not specified)

### 4. Peak Filters:

- S/N Threshold (FT-only): 1.5

### 5. Replacements for Unrecognized Properties:

- Unrecognized Charge Replacements: 1
- Unrecognized Mass Analyzer Replacements: ITMS
- Unrecognized MS Order Replacements: MS2
- Unrecognized Activation Type Replacements: CID
- Unrecognized Polarity Replacements: +
- Unrecognized MS Resolution@200 Replacements: 60000
- Unrecognized MSn Resolution@200 Replacements: 30000

---

## Processing node 2: Align Retention Times

---

### 1. General Settings:

- Alignment Model: Adaptive curve
- Alignment Fallback: Use Linear Model
- Maximum Shift [min]: 1.5
- Shift Reference File: True
- Mass Tolerance: 4 ppm
- Remove Outlier: True

---

## Processing node 3: Detect Compounds

---

### 1. General Settings:

- Mass Tolerance [ppm]: 4 ppm

- Intensity Tolerance [%]: 30
- S/N Threshold: 3
- Min. Peak Intensity: 120000
- Ions: [M+2H]<sup>2+</sup>; [M+ACN+H]<sup>+</sup>; [M+H]<sup>+</sup>; [M+H-H<sub>2</sub>O]<sup>+</sup>
- Base Ions: [M+H]<sup>+</sup>; [M-H]<sup>-</sup>
- Min. Element Counts: C
- Max. Element Counts: C90 [13]C H190 Br3 Cl4 D5 K2 N10 [15]N Na2 O15 P2 S5

## 2. Peak Detection:

- Filter Peaks: True
- Max. Peak Width [min]: 1
- Remove Singlets: True
- Min. # Scans per Peak: 10
- Min. # Isotopes: 1

---

## Processing node 23: Group Compounds

---

### 1. Compound Consolidation:

- Mass Tolerance: 4 ppm
- RT Tolerance [min]: 1

### 2. Fragment Data Selection:

- Preferred Ions: [M+H]<sup>+</sup>; [M-H]<sup>-</sup>

---

## Processing node 21: Fill Gaps

---

### 1. General Settings:

- Mass Tolerance: 4 ppm
- S/N Threshold: 8
- Use Real Peak Detection: True

---

## Processing node 37: Search mzCloud

---

### 1. General Settings:

- Compound Classes: All
- Precursor Mass Tolerance: 10 ppm
- FT Fragment Mass Tolerance: 10 ppm
- IT Fragment Mass Tolerance: 0.4 Da
- Library: Autoprocessed; Reference
- Post Processing: Recalibrated
- Max. # Results: 10
- Annotate Matching Fragments: False

## 2. DDA Search:

- Identity Search: HighChem HighRes
- Match Activation Type: True
- Match Activation Energy: Match with Tolerance
- Activation Energy Tolerance: 20
- Apply Intensity Threshold: True
- Similarity Search: None
- Match Factor Threshold: 60

## 3. DIA Search:

- Use DIA Scans for Search: False
- Max. Isolation Width [Da]: 500
- Match Activation Type: False
- Match Activation Energy: Any
- Activation Energy Tolerance: 100
- Apply Intensity Threshold: False
- Match Factor Threshold: 20

---

## Processing node 40: Assign Compound Annotations

---

### 1. General Settings:

- Mass Tolerance: 5 ppm

### 2. Data Sources:

- Data Source #1: mzCloud Search
- Data Source #2: Predicted Compositions
- Data Source #3: MassList Search
- Data Source #4: ChemSpider Search
- Data Source #5: (not specified)
- Data Source #6: (not specified)
- Data Source #7: (not specified)

### 3. Scoring Rules:

- Use mzLogic: True
- Use Spectral Distance: True
- SFit Threshold: 20
- SFit Range: 20

---

## Processing node 38: Search Mass Lists

---

### 1. Search Settings:

- Mass Lists: Endogenous Metabolites database 4400 compounds.massList
- Mass Tolerance: 5 ppm
- Use Retention Time: True

- RT Tolerance [min]: 2

---

Processing node 39: Search mzVault

---

1. Search Settings:

- mzVault Library: Custom mzVault Library.db
- Max. # Results: 10
- Match Factor Threshold: 50
- Search Algorithm: HighChem HighRes
- Match Analyzer Type: True
- IT Fragment Mass Tolerance: 0.4 Da
- FT Fragment Mass Tolerance: 10 ppm
- Use Retention Time: False
- Precursor Mass Tolerance: 10 ppm
- Apply Intensity Threshold: True
- Match Ionization Method: True
- Ion Activation Energy Tolerance: 20
- Match Ion Activation Energy: Match with Tolerance
- Match Ion Activation Type: True
- Compound Classes: All
- Remove Precursor Ion: True
- RT Tolerance [min]: 2

---

Processing node 24: Mark Background Compounds

---

1. General Settings:

- Max. Sample/Blank: 5
- Max. Blank/Sample: 0
- Hide Background: False

---

Processing node 10: Search ChemSpider

---

1. Search Settings:

- Database(s): KEGG; LipidMAPS
- Search Mode: By Formula or Mass
- Mass Tolerance: 5 ppm
- Max. # of results per compound: 100
- Max. # of Predicted Compositions to be searched per Compound: 3
- Result Order (for Max. # of results per compound): Order By Reference Count (DESC)

2. Predicted Composition Annotation:

- Check All Predicted Compositions: True

---

## Processing node 8: Predict Compositions

---

### 1. Prediction Settings:

- Mass Tolerance: 4 ppm
- Min. Element Counts: C H
- Max. Element Counts: C90 H190 Br3 Cl4 K2 N10 Na2 O15 P2 S5
- Min. RDBE: -1
- Max. RDBE: 40
- Min. H/C: 0.1
- Max. H/C: 3
- Max. # Candidates: 10
- Max. # Internal Candidates: 200

### 2. Pattern Matching:

- Intensity Tolerance [%]: 30
- Intensity Threshold [%]: 0.1
- S/N Threshold: 3
- Min. Spectral Fit [%]: 10
- Min. Pattern Cov. [%]: 90
- Use Dynamic Recalibration: True

### 3. Fragments Matching:

- Use Fragments Matching: True
- Mass Tolerance: 5 ppm
- S/N Threshold: 3

---

## Processing node 27: Find Expected Compounds

---

### 1. General Settings:

- Mass Tolerance: 5 ppm
- Intensity Tolerance [%]: 40
- Intensity Threshold [%]: 0.1
- SN Threshold: 3
- Min. # Isotopes: 2
- Min. Peak Intensity: 100000
- Average Peak Width [min]: 0

---

## Processing node 33: Group Expected Compounds

---

### 1. Compound Consolidation:

- RT Tolerance [min]: 0.5

### 2. Fragment Data Selection:

- Preferred Ions: [M-2H]-2; [M-H]-1; [M-H-H2O]-1

---

Processing node 34: FISh Scoring

---

1. General Settings:

- Annotate Full Tree: True
- Match Transformations: True
- S/N Threshold: 3
- High Acc. Mass Tolerance: 2.5 mmu
- Low Acc. Mass Tolerance: 0.5 Da

2. Fragment Prediction Settings:

- Use General Rules: True
- Use Libraries: True
- Max. Depth: 5
- Aromatic Cleavage: True
- Min. Fragment m/z: 50

---

Processing node 35: Mark Background Compounds

---

1. General Settings:

- Max. Sample/Blank: 5
- Max. Blank/Sample: 0
- Hide Background: True

---

Processing node 32: Generate Expected Compounds

---

1. Compound Selection:

- Compounds: propranolol (C16 H21 N O2)

2. Dealkylation:

- Apply Dealkylation: True
- Apply Dearylation: True
- Max. # Steps: 1
- Min. Mass [Da]: 120

3. Transformations:

- Phase I:

- Dehydration (H2 O -> )
- Desaturation (H2 -> )
- Hydration ( -> H2 O)
- Nitro Reduction (O2 -> H2)
- Oxidation ( -> O)



Oxidative Deamination to Alcohol (H2 N -> H O)

Oxidative Deamination to Ketone (H3 N -> O)

Reduction ( -> H2)

Thiourea to Urea (S -> O)

- Phase II:

Acetylation (H -> C2 H3 O)

Arginine Conjugation (H O -> C6 H13 N4 O2)

Cysteine Conjugation 1 (H -> C3 H6 N O2 S)

Cysteine Conjugation 2 ( -> C3 H7 N O2 S)

Glucoside Conjugation (H -> C6 H11 O5)

Glucuronide Conjugation (H -> C6 H9 O6)

Glutamine Conjugation (H O -> C5 H9 N2 O3)

Glycine Conjugation (H O -> C2 H4 N O2)

GSH Conjugation 1 ( -> C10 H15 N3 O6 S)

GSH Conjugation 2 ( -> C10 H17 N3 O6 S)

Methylation (H -> C H3)

Ornithine Conjugation (H O -> C5 H11 N2 O2)

Palmitoyl Conjugation (H -> C16 H31 O)

Stearyl Conjugation (H -> C18 H35 O)

Sulfation (H -> H O3 S)

Taurine Conjugation (H O -> C2 H6 N O3 S)

- Others: (not specified)

- Max. # Phase II: 3

- Max. # All Steps: 5

4. Ionization:

- Ions: [M+H]<sup>+</sup>

---

Processing node 12: Differential Analysis

---

1. General Settings:

- Log10 Transform Values: True
